# Supplementary material
Source: MDPI journal article supplement (https://www.mdpi.com/2504-4494/4/4/98)
Supplement: s1 [file s1]

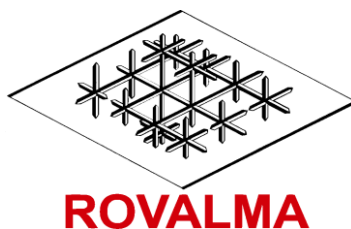

# Quality Control Protocol

**Material:** HWS® powder

**Recipient:** MDT CO., LTD

**Rovalma's  
reference:** 171402C02001

**Recipient's  
reference:** 17-016-S-0213

**Nr. of delivery note:** 17-01346

**Date of delivery note:** 21/02/2017

This Quality Control Protocol (henceforth also referred to as "QCP") concerns the material specified on the beginning of this QCP. The values documented in this QCP result from analyses and tests carried out on samples taken from the original material. The herein documented results have been obtained by extraction of random material samples. The properties of the material from other extraction zones of the same may result different due to material heterogeneity, differences in measurement, testing and evaluation methods, test settings of employed test instruments or subsequent processing steps that the material has been subjected to.

It is prohibited to alter the contents and/or use, any information provided herein, out of context. This QCP may not be, entirely or partially, reproduced, copied, distributed or modified, disintegrated, or changed in any other way, without the explicit authorization by Rovalma, S.A.. All information provided in this QCP is for general information purposes only, and is provided "AS IS" and "As available" and without warranty, express or implied, of any kind regarding completeness, faultlessness, accuracy, up-to-dateness, individual interpretations, merchantability or fitness for any purpose and no representation contained in this quality protocol shall be binding upon ROVALMA S.A.. All information shall be provided and accepted at Receiver's risk.

Composition

Instrument Employed: ICP and LECO

- Functional elements:

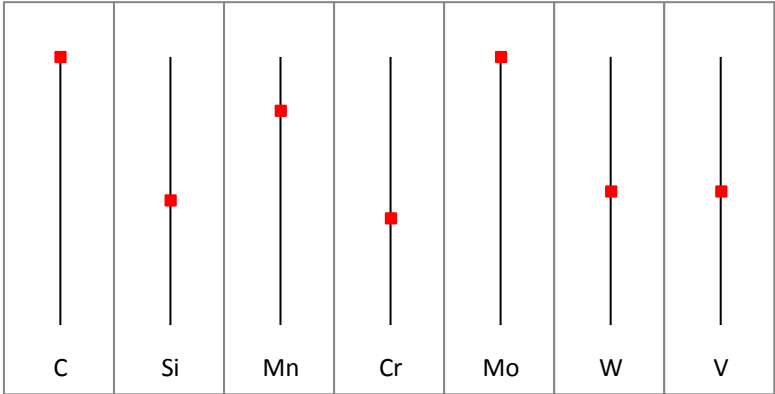

All elements within specifications: YES

Deviating elements and per cent deviation: NONE

Is deviation critical: Does not apply

Can composition be generally accepted: YES

Can composition be accepted with restrictions: Does not apply

Specify: Does not apply

Comments: Values for each element are normalized in the range

Tap density

|                            |                       |
|----------------------------|-----------------------|
| Based on Norm:             | ISO 3953/ASTM B527-15 |
| Density:                   | 5.5 g/cc              |
| Level is within set range: | YES                   |

Particle size distribution

|                      |                           |
|----------------------|---------------------------|
| Based on Norm:       | ASTM B822 - 10            |
| Instrument Employed: | Beckman Coulter LS 13 320 |
| Particle size data:  |                           |

| Size [micron] | Distribution [%] |
|---------------|------------------|
| +45           | ~3.0             |
| -45           | ~97.0            |

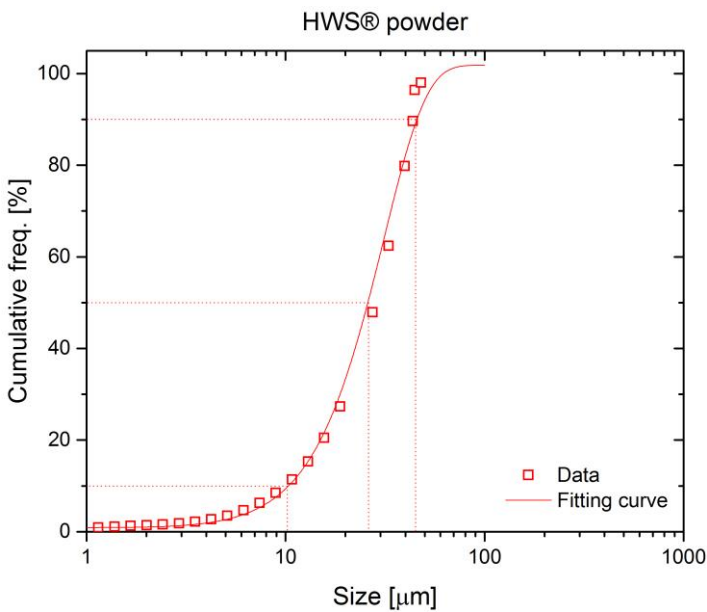

|                            |     |
|----------------------------|-----|
| Level is within set range: | YES |
|----------------------------|-----|

|                                                                                                                 |                                                                                                                           |                                                                                                                                         |
|-----------------------------------------------------------------------------------------------------------------|---------------------------------------------------------------------------------------------------------------------------|-----------------------------------------------------------------------------------------------------------------------------------------|
| <b>ROVALMA, S.A.</b><br>HT<br>C/ Apol.lo, 51<br>08228 Terrassa SPAIN<br>Tel. +34 935 862949<br>Fax+34 935881860 | <b>ROVALMA, S.A.</b><br>HEAD OFFICE<br>C/ La Collita, 1-3<br>08191 Rubí SPAIN<br>Tel. +34 935 862949<br>Fax +34 935881860 | <b>ROVALMA GmbH</b><br>GERMAN OFFICE<br>Geibelstraße 5<br>12205 Berlin GERMANY<br>Tel. +49 (0)30 810 597-17<br>Fax +49 (0)30 810 597-15 |
|-----------------------------------------------------------------------------------------------------------------|---------------------------------------------------------------------------------------------------------------------------|-----------------------------------------------------------------------------------------------------------------------------------------|
